# Supplementary figures and images for: Synthesis of nanostructured polymer-titanium oxide composites through the assembly of titanium-oxo clusters and amphiphilic block copolymers micelles
Source: Royal Society of Chemistry journal article supplement (doi:10.1039/b203566a), 2002-01-01

### SAXS diffractograms of PS-Ti-I and PS-Ti-II.

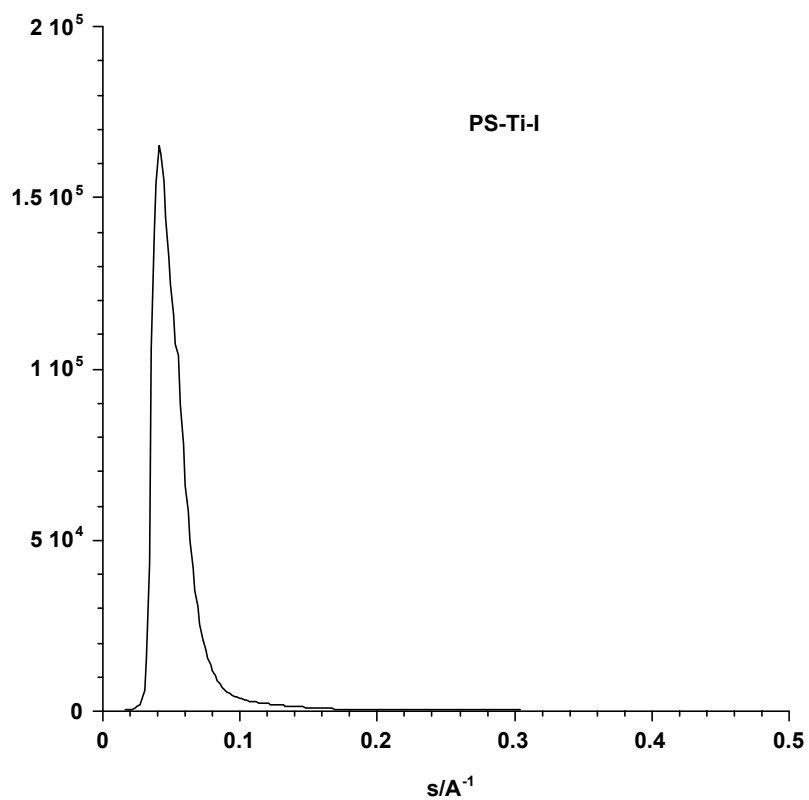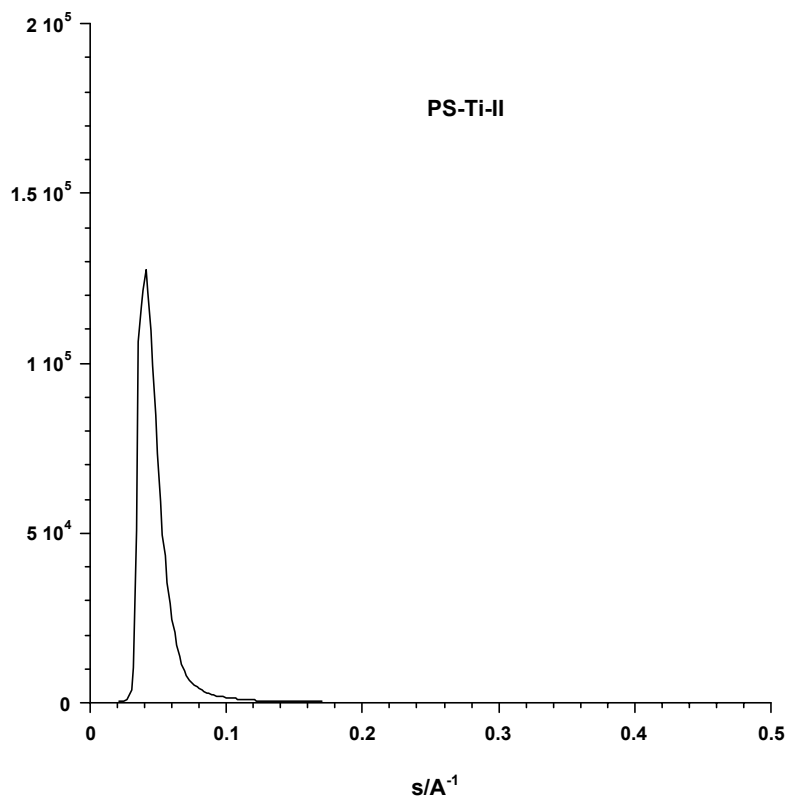

Supplement: b203566a.pdf [file b203566a.pdf]
